# Supplementary material for: Dental Follicle Stem Cells Promote Periodontal Regeneration through Periostin-Mediated Macrophage Infiltration and Reprogramming in an Inflammatory Microenvironment
Source: MDPI journal article supplement (doi:10.3390/ijms24076353), 2023-03-28
Supplement: s1 [file s1]

## Supplementary information and results

**Table S1. Primer sequence used for quantitative RT-PCR**

| Gene                                 | Forward primer                 | Reverse primer                |
|--------------------------------------|--------------------------------|-------------------------------|
| <i>human Periostin</i>               | 5'-CACTCTTTGCTCCCACCAATA-3'    | 5'-ATTCCTTCCAGCGTCTCAA-3'     |
| <i>human NOS2</i>                    | 5'-TTTCCAAGACACACTTCACCA-3'    | 5'-ATCTCCTTTGTTACCGCTTCC-3'   |
| <i>human IL-1<math>\beta</math></i>  | 5'-CTTTGAAGCTGATGGCCCTAAA-3'   | 5'-AGTGGTGGTCGGAGATTCGT-3'    |
| <i>human IL-6</i>                    | 5'-TGTGAAAGCAGCAAAGAGGC-3'     | 5'-TGGGTCAGGGGTGGTTATT-3'     |
| <i>human IL-12</i>                   | 5'- TTCCCTGGTTTTTCTGGCATCTC-3' | 5'-CTTGGATGGTCAGGGTTTTGCCA-3' |
| <i>human NF-<math>\kappa</math>B</i> | 5'-GGTGGACTACCTGGTGCCTCTAG-3'  | 5'-CGCCTCTGTCATTTCGTGCTTCC-3' |
| <i>human GAPDH</i>                   | 5'-CTTTGGTATCGTGGAAGGACTC-3'   | 5'-GTAGAGGCAGGGATGATGTTCT-3'  |

**Table S2. The antibodies used in the study**

| Abbreviation | Antibody full name                     | Manufacture | Product No. | Concentration | Application    |
|--------------|----------------------------------------|-------------|-------------|---------------|----------------|
| Periostin    | Periostin (H-300)                      | santa cruz  | sc-67233    | 1:1000        | WB             |
| <i>CD163</i> | anti-CD163 antibody                    | abcam       | Ab182422    | 1:1000        | WB             |
| <i>p-Erk</i> | Phospho-p44/42 MAPK (Erk1/2)           | CST         | #4370       | 1:1000        | WB             |
| <i>Erk</i>   | p44/42 MAPK (Erk1/2) (137F5)           | CST         | #4695       | 1:1000        | WB             |
| <i>GAPDH</i> | GAPDH                                  | Zen         | 200306-7E4  | 1:5000        | WB             |
| Periostin    | Periostin (H-300)                      | santa cruz  | sc-67233    | 1:200         | IF             |
| <i>CD68</i>  | anti-CD68 antibody                     | abcam       | ab201340    | 1:200         | IHC            |
| <i>CD163</i> | anti-CD163 antibody                    | abcam       | Ab182422    | 1:200         | IHC            |
| <i>NOS2</i>  | NOS2                                   | santa cruz  | sc-7271     | 1:200         | IHC            |
| <i>CD163</i> | Alexa Fluor 647 Mouse Anti-Human CD163 | BD          | 562669      | 5µl/test      | Flow Cytometry |
| <i>NOS2</i>  | NOS2                                   | santa cruz  | sc-7271     | 5µl/test      | Flow Cytometry |
| Integrin αM  | FITC Rat Anti-CD11b                    | BD          | 557396      | 2µl/test      | Flow Cytometry |

**Table S3. The inclusion and exclusion criteria in the animal experiment.**

| inclusion criteria                                                                                                                                                         | exclusion criteria                                                                                                                                                                     |
|----------------------------------------------------------------------------------------------------------------------------------------------------------------------------|----------------------------------------------------------------------------------------------------------------------------------------------------------------------------------------|
| <b>1. Male.</b><br><br><b>2. Body initial weight 200-250g.</b><br><br><b>3. General healthy.</b><br><br><b>4. Without any oral disease or developmental abnormalities.</b> | <b>1. Animals die before the end of the experiment.</b><br><br><b>2. Post-operative infection.</b><br><br><b>3. Other systemic disease (whether related to surgery) after surgery.</b> |

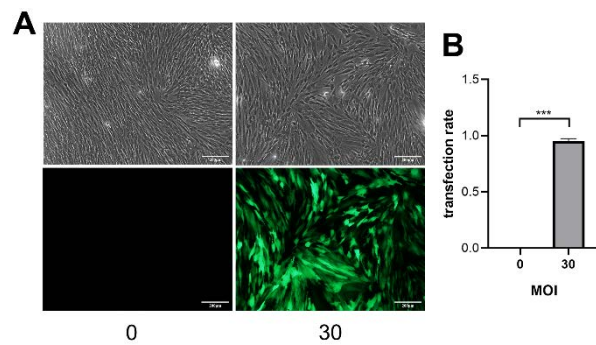

**Fig. S1 Transfection of DFSCs.**

(A) Representative images and analysis (B) of the lentiviruses transfection rate of DFSCs. Cells in the upper and lower columns were observed under bright-field and fluorescence field microscopy, respectively. MOI: multiplicity of infection. \* $p < 0.05$ ; \*\* $p < 0.01$ ; \*\*\* $p < 0.001$ . Error bars are means  $\pm$  SD. Data were analyzed using independent unpaired two-tailed Student's t-test.
